# Supplementary material for: Magnetic-responsive switchable emulsions based on Fe3O4@SiO2–NH2 nanoparticles
Source: Royal Society of Chemistry journal article supplement (doi:10.1039/c8cc04811h), 2018-01-01
Supplement: c8cc04811h10.pdf [file c8cc04811h10.pdf]

1 Supporting Information  
2 Magnetic-responsive switchable emulsions based on  
3 Fe<sub>3</sub>O<sub>4</sub>@SiO<sub>2</sub>-NH<sub>2</sub> nanoparticles  
4 Hui Yang,<sup>\*,†</sup> Qingfeng Hou,<sup>‡</sup> Shujuan Wang,<sup>†</sup> Donghong Guo,<sup>‡</sup> Guangxin Hu,<sup>†</sup> Yuan  
5 Xu,<sup>§</sup> Jing Tai,<sup>§</sup> Xu Wu,<sup>⊥</sup> Danfeng Yu,<sup>⊥</sup> Jinben Wang<sup>†</sup>  
6 <sup>†</sup>CAS Key Lab of Colloid, Interface and Chemical Thermodynamics, Institute of  
7 Chemistry, Chinese Academy of Sciences, Beijing 100190, P. R. China  
8 <sup>‡</sup>Key Laboratory of Oilfield Chemistry, Research Institute of Petroleum Exploration  
9 and Development (RIPED), CNPC, Beijing 100083, P. R. China  
10 <sup>§</sup>Institute of Chemistry, Chinese Academy of Sciences, Beijing 100190, P. R. China  
11 <sup>⊥</sup>Department of Chemistry and Chemical Engineering, Guangzhou University,  
12 Guangzhou, Guangdong 510006, P. R. China

## 1 *Experimental*

2 *Preparation of unmodified and modified Fe<sub>3</sub>O<sub>4</sub> MNPs.* They were prepared by co-  
3 precipitation of aqueous ferrous and ferric ions.<sup>25</sup> 0.5 M FeSO<sub>4</sub> solution with 0.2 M  
4 HCl, 1 M FeCl<sub>3</sub> solution with 0.2 M HCl and 1.5 M NaOH solution were prepared,  
5 respectively. 100 mL NaOH solution was added into a flask and heated to 80 °C.  
6 Then the mixture of 10 mL FeSO<sub>4</sub> solution and 10 mL FeCl<sub>3</sub> solution was added into  
7 the flask dropwise in an N<sub>2</sub> atmosphere and at the temperature of 80 °C. The black  
8 product was obtained after 30 min and the system was cooled down with continuous  
9 stirring. The Fe<sub>3</sub>O<sub>4</sub> nanoparticles were washed more than three times with water and  
10 ethanol, respectively.

11 The prepared Fe<sub>3</sub>O<sub>4</sub> nanoparticles were dispersed in 50 mL ethanol by a S04H  
12 ultrasonic cleaning machine (Zhiwei Instrument Co., Ltd., China) for 5 min, and then  
13 poured into a flask. 100 mL toluene and 3-aminopropyltriethoxy silane (Meryer  
14 Chemical Technology Co., Ltd., AR, 98%) were added into the flask which was  
15 heated to 110 °C in N<sub>2</sub> atmosphere. The reaction process is described as shown in  
16 Figure S9 a~c. The modified particles were obtained after 8 h and the system was  
17 separated with a hand magnet. The product was washed more than three times with  
18 ethanol and water, respectively, and then dried in a LGJ-10 freeze dryer (Beijing  
19 Songyuanhuaxing Technology Development Co., Ltd., China). Other chemicals (AR,  
20 99%) were purchased from Sinopharm Chemical Reagent Beijing Co., Ltd.

21 *Characterization of MNPs.* The composition of Fe<sub>3</sub>O<sub>4</sub> and Fe<sub>3</sub>O<sub>4</sub>@SiO<sub>2</sub>-NH<sub>2</sub>  
22 nanoparticles was determined by a TENSOR-27 fourier transform infrared

1 spectroscopy (FTIR, Bruker, Germany) spectra ranging from 400 to 4000  $\text{cm}^{-1}$ , and  
2 the disk shaped samples were obtained by compression molding with KBr. The  
3 weight change of nanoparticles was examined by a TG-DTA6300 thermogravimetric  
4 analyzer (NSK, Japan) from 30 to 1000  $^{\circ}\text{C}$  at a heating rate of 10  $^{\circ}\text{C}/\text{min}$  in  $\text{N}_2$   
5 atmosphere. The magnetic properties of MNPs before and after modification were  
6 measured with a PPMS-9 magnetometer/susceptometer (Quantum Design Inc.,  
7 America). The measurements were conducted at room temperature with a  
8 magnetization field strength cycling from -10000 Oe to 10000 Oe and back to -10000  
9 Oe. Nanoparticles were dispersed in water at a concentration of 0.4 wt.% using an  
10 ultrasonic cleaning machine for 1 h, and then added one drop onto a carbon-coated  
11 copper grid. After drying, the samples were imaged under a JEM-2100F transmission  
12 electron microscope (TEM) at a working voltage of 200 kV (JEOL, Japan). The  
13 elemental surface component of MNPs was determined by X-ray photoelectron  
14 spectroscopy (XPS) using ESCALab 250Xi with 200 W monochromated Al Ka  
15 radiation. The base pressure in the analysis chamber was about  $3 \times 10^{-10}$  mbar and the  
16 hydrocarbon C1s line at 284.8 eV from adventitious carbon was used for energy  
17 referencing. Size distribution of MNPs was measured using a Zetasizer (Malvern,  
18 England) at room temperature. Water contact angle (CA) of surfaces pressed by  
19 nanoparticles was measured by the CA goniometer (OCA 20L, Dataphysics Inc.) with  
20 a sessile-drop method. During the experiment, 2  $\mu\text{L}$  water drop gradually approached  
21 and remained on the surfaces with an aging time of about 5 min. The CA values were

1 obtained from video snapshots using a tangent-fitting method in data analysis  
2 software (SCA 22).

3 *Preparation and characterization of Pickering emulsions.* Emulsions were prepared  
4 using the mixture of n-dodecane (J&K Scientific Ltd., AR, 98%) and water in a 2:1  
5 volume ratio, and stabilized by MNPs at the particle concentration of 0~1 wt% which  
6 was initially dispersed in n-dodecane. The mixture was vibrated using a DMT-2500  
7 multitube vortex mixer (Hangzhou Mio Instrument Co., Ltd., China) at a speed of  
8 2,500 rpm for 30 s. There is an obvious oil-water separation after 17 h in the presence  
9 of 0.05 wt% of magnetic NPs (Figure S10) and a quick complete separation under  
10 external response (Movie S8) and, therefore, we selected the low concentration from  
11 0.1 wt% in which case the emulsion system performs a good stability without external  
12 response. In the case of higher concentrations such as 1 wt%, the emulsion performs  
13 such a strong stability that the system needs longer time ( $\geq 1$  h) to be demulsified  
14 under external response (Movie S9) and, therefore, we selected the high  
15 concentrations of 0.2 and 0.4 wt% as control experiments. The morphology of  
16 emulsion droplets was performed on a B011 stereo microscope (Shenzhen Super Eye  
17 Technology Co., Ltd., China). The size distribution of emulsion droplets has been  
18 measured through a particle size analyzer (Microtrac S3500SI, America). The  
19 emulsion type was determined by measuring the conductivity of the emulsion phase  
20 through 4320 conductivity meter (Jenway, England), in which the cell constant is  
21  $0.930\text{ cm}^{-1}$ . Millipore Milli-Q grade water ( $18.2\text{ M}\Omega\cdot\text{cm}$ ) was used in all our  
22 experiments and all the measurements were carried out under room temperature.

1 *Demulsification Process.* The emulsions were poured into a beaker and placed onto a  
2 hand magnet of 0.4 T on surface (Figure S9 d~f). To squeeze the emulsion drops and  
3 assist the demulsification, a mechanical stirring was also applied at a very low speed  
4 of 30 rpm as shown in Movie S1~S3. In comparison, only the mechanical stirring  
5 without magnet field was applied at the same speed in the emulsion systems as shown  
6 in Movie S4~S6.

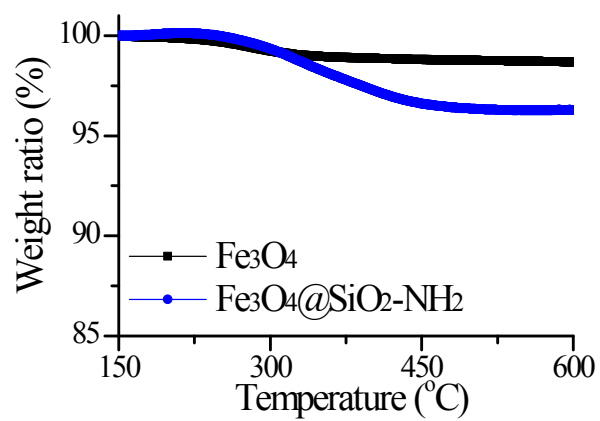

1

2 Figure S1 TGA curves of Fe<sub>3</sub>O<sub>4</sub> and Fe<sub>3</sub>O<sub>4</sub>@SiO<sub>2</sub>-NH<sub>2</sub> nanoparticles.

1

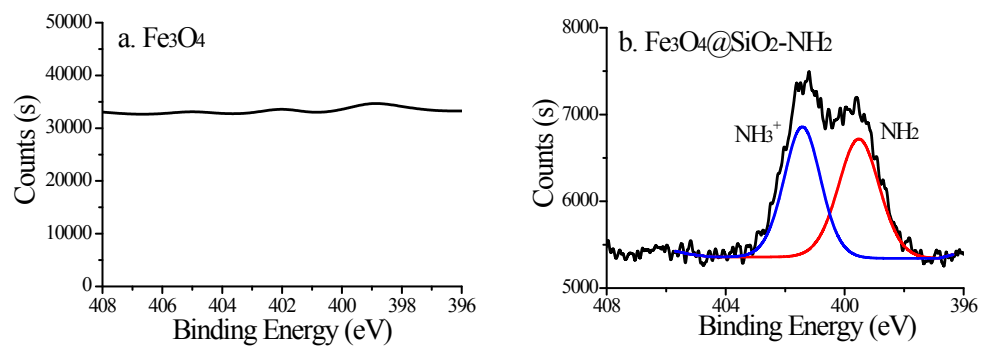

2

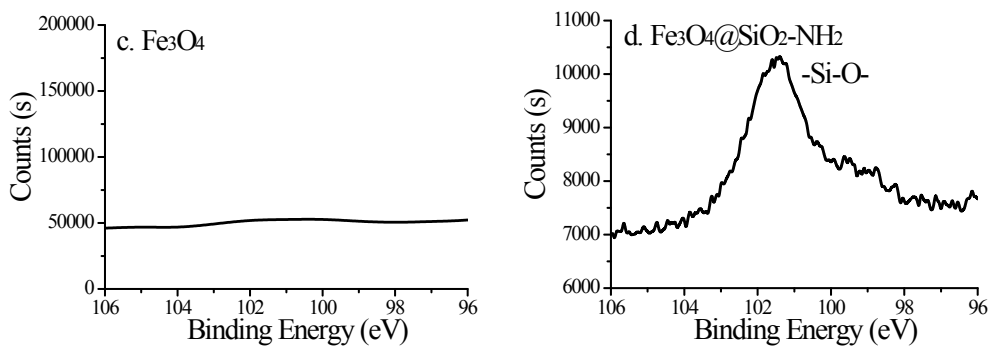

3

Figure S2 XPS spectra of bare Fe<sub>3</sub>O<sub>4</sub> (a, c) and Fe<sub>3</sub>O<sub>4</sub>@SiO<sub>2</sub>-NH<sub>2</sub> (b, d)

4

nanoparticles.

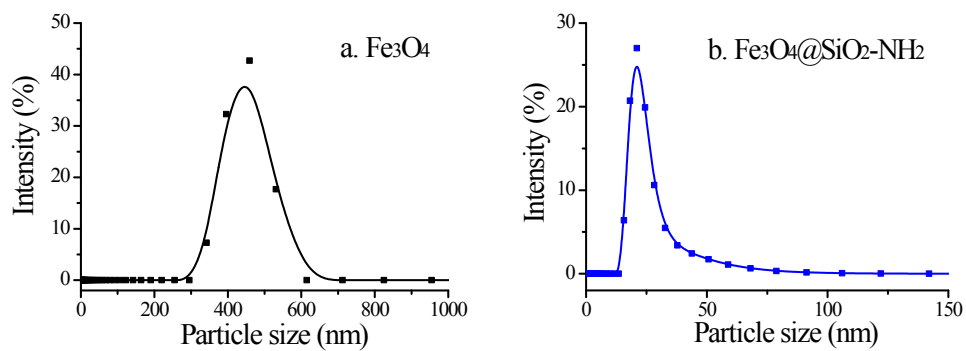

1

2 Figure S3 Size distribution of bare Fe<sub>3</sub>O<sub>4</sub> and Fe<sub>3</sub>O<sub>4</sub>@SiO<sub>2</sub>-NH<sub>2</sub> nanoparticles.



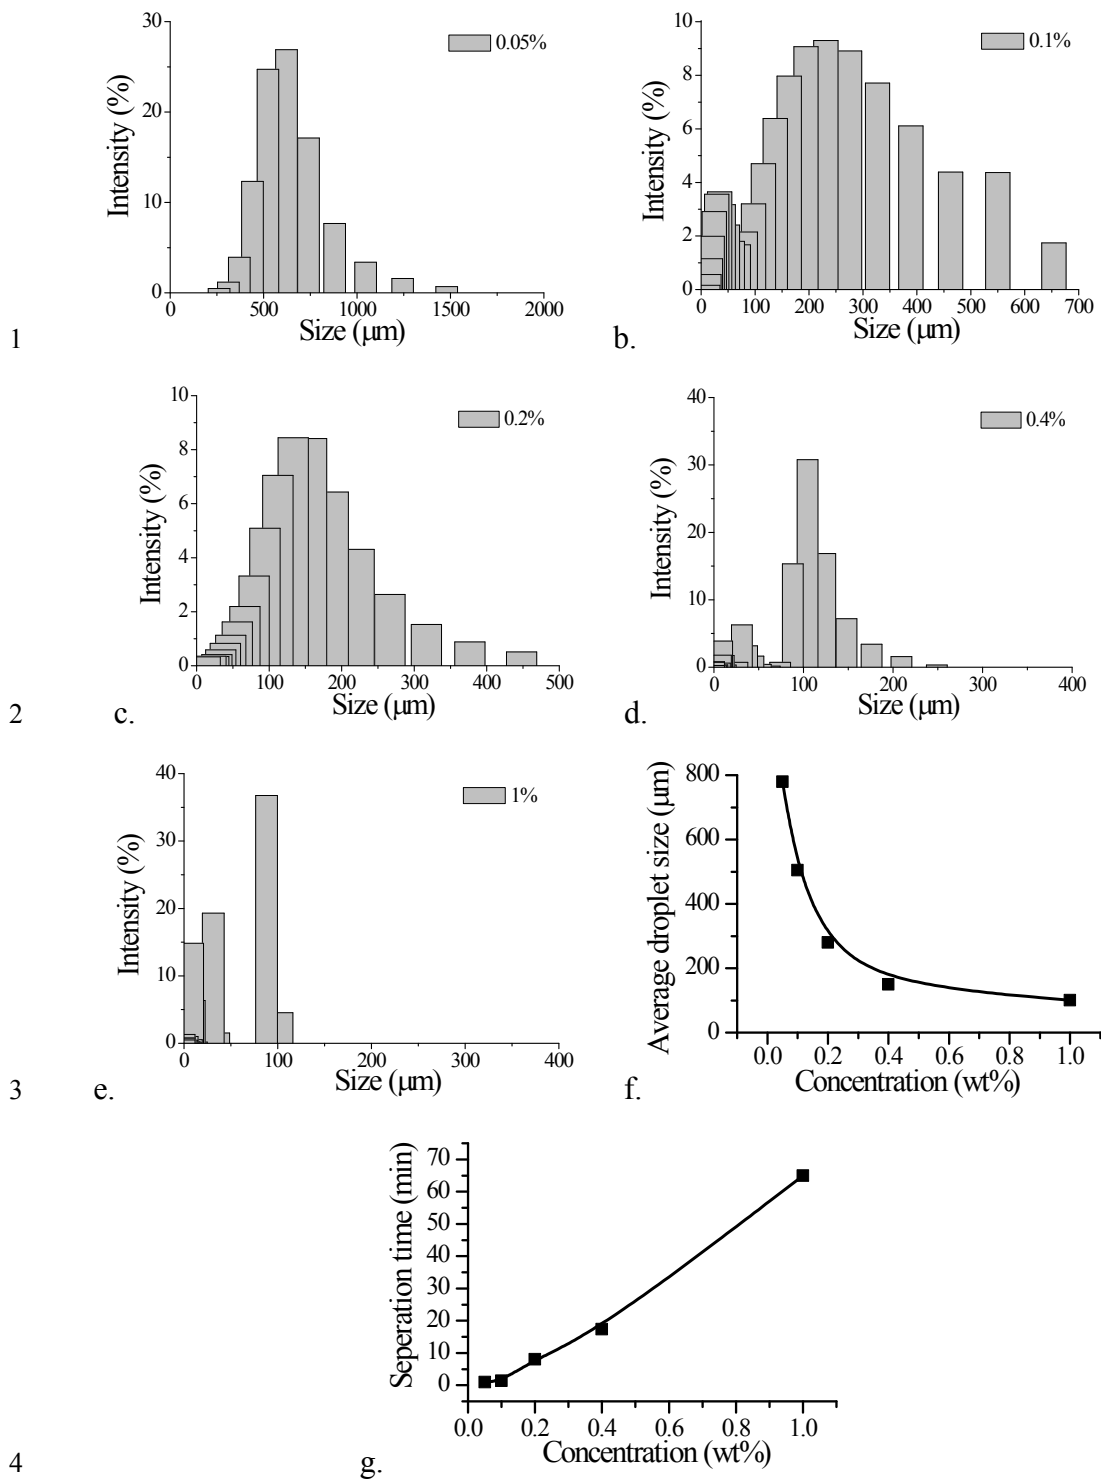

1 Figure S4 Size distribution of the droplets in the presence of  $\text{Fe}_3\text{O}_4@\text{SiO}_2\text{-NH}_2$   
 2 nanoparticles at different concentrations of (a)~(e) 0.05~1 wt%. (f) variation trend of  
 3 average droplet size and (g) stability ability of emulsions with the increase of particle  
 4 concentration.

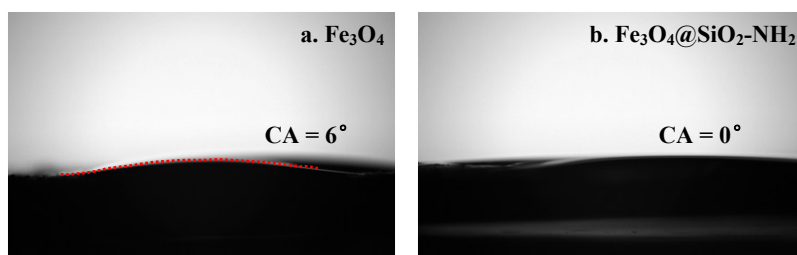

1

2 Figure S5 Contact angle (CA) of surfaces pressed by bare (a) Fe<sub>3</sub>O<sub>4</sub> and (b)

3

Fe<sub>3</sub>O<sub>4</sub>@SiO<sub>2</sub>-NH<sub>2</sub> nanoparticles.

4

**First circulation:**

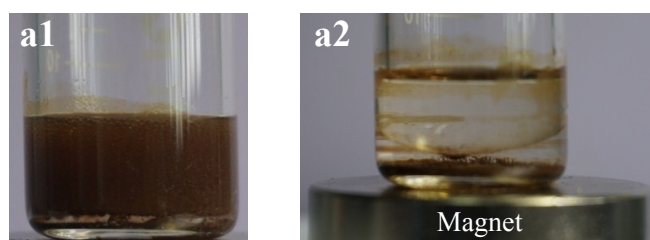

**Second circulation:**

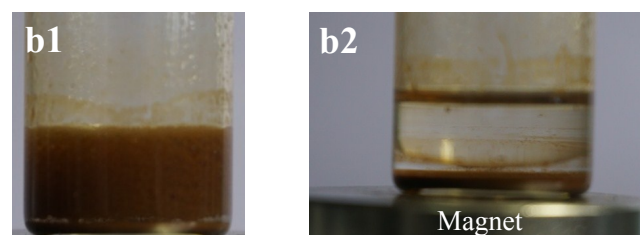

**Third circulation:**

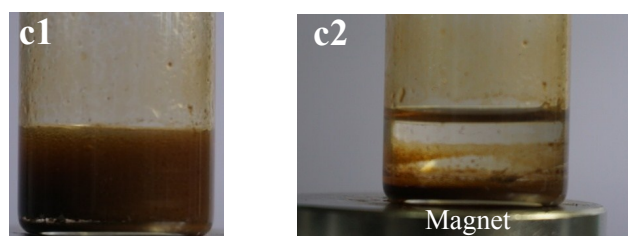

**Fourth circulation:**

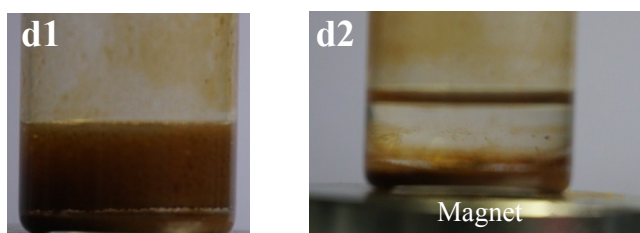

**Fifth circulation:**

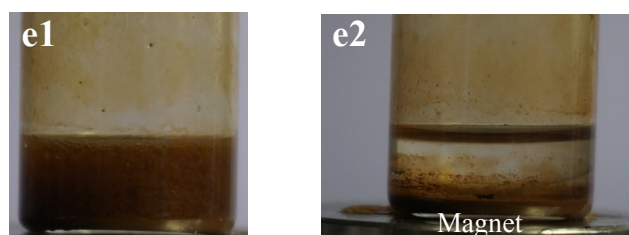

1

2 Figure S6 Five circulations of emulsification (a1~e1) and demulsification (a2~e2) of  
3 emulsions stabilized  $\text{Fe}_3\text{O}_4@\text{SiO}_2\text{-NH}_2$  nanoparticles at 0.4 wt%.

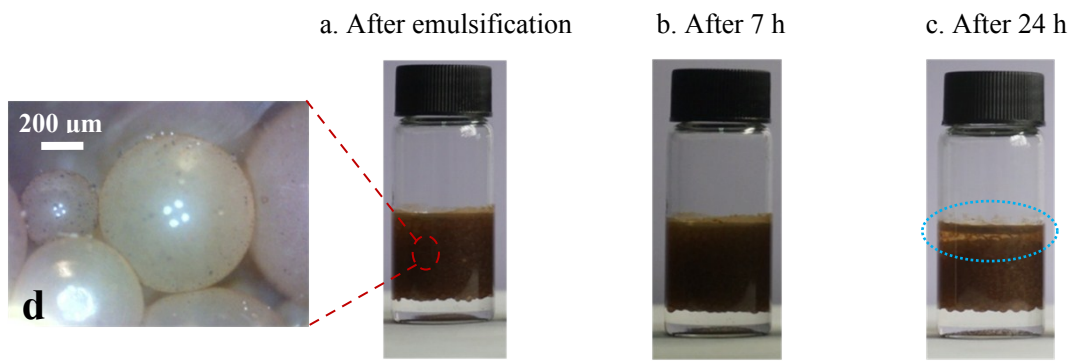

1

2 Figure S7 Emulsions stabilized by  $\text{Fe}_3\text{O}_4$  nanoparticles at 0.2 wt% after preparation

3 (a), placed in 7 h (b) and 24 h (c). (d) Stereo microscopic image of emulsion.

**a. After emulsification**

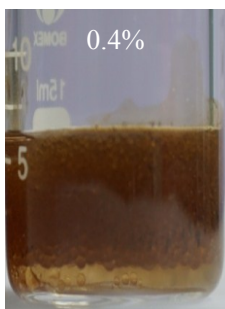

**b. After demulsification**

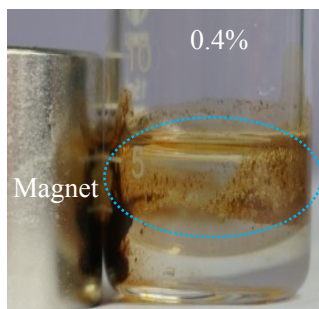

**c. After demulsification**

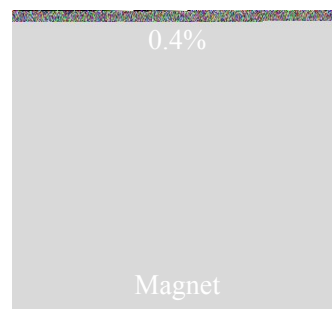

1

- 2 Figure S8 Emulsions stabilized by  $\text{Fe}_3\text{O}_4@\text{SiO}_2\text{-NH}_2$  nanoparticles at 0.4 wt% after  
3 preparation (a), after demulsification with the magnet beside the emulsion vessel (b)  
4 and after demulsification with the magnet under the emulsion vessel (c).

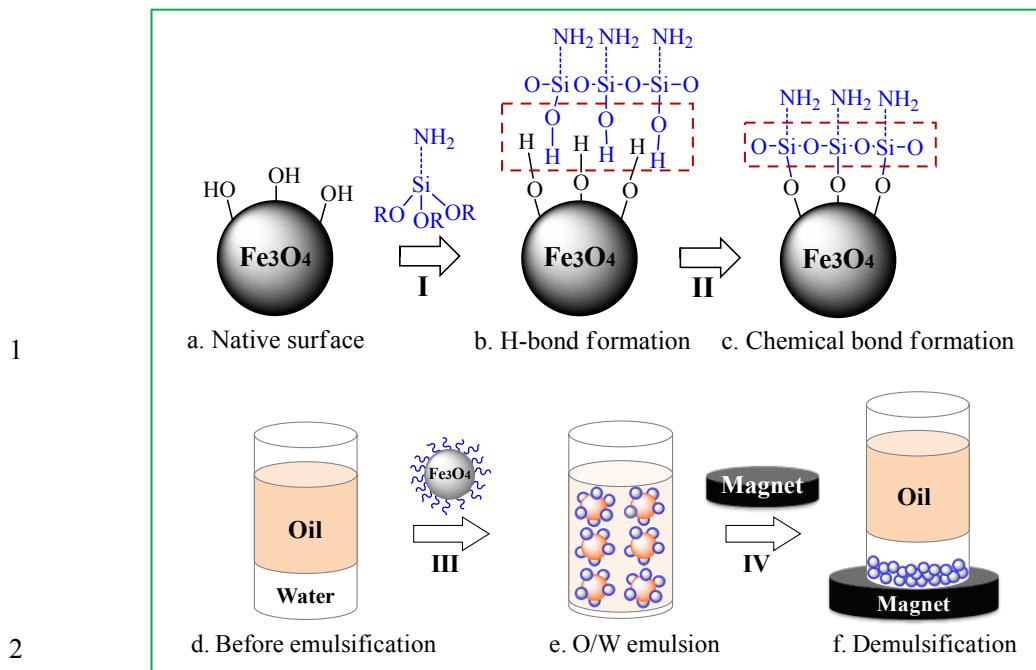

Figure S9 Schematics of preparation of Fe<sub>3</sub>O<sub>4</sub>@SiO<sub>2</sub>-NH<sub>2</sub> nanoparticles: (a) bare Fe<sub>3</sub>O<sub>4</sub> nanoparticles; (b) H-bond formation; (c) chemical bond formation. Schematics of the formation of emulsion and demulsification (d)~(f).

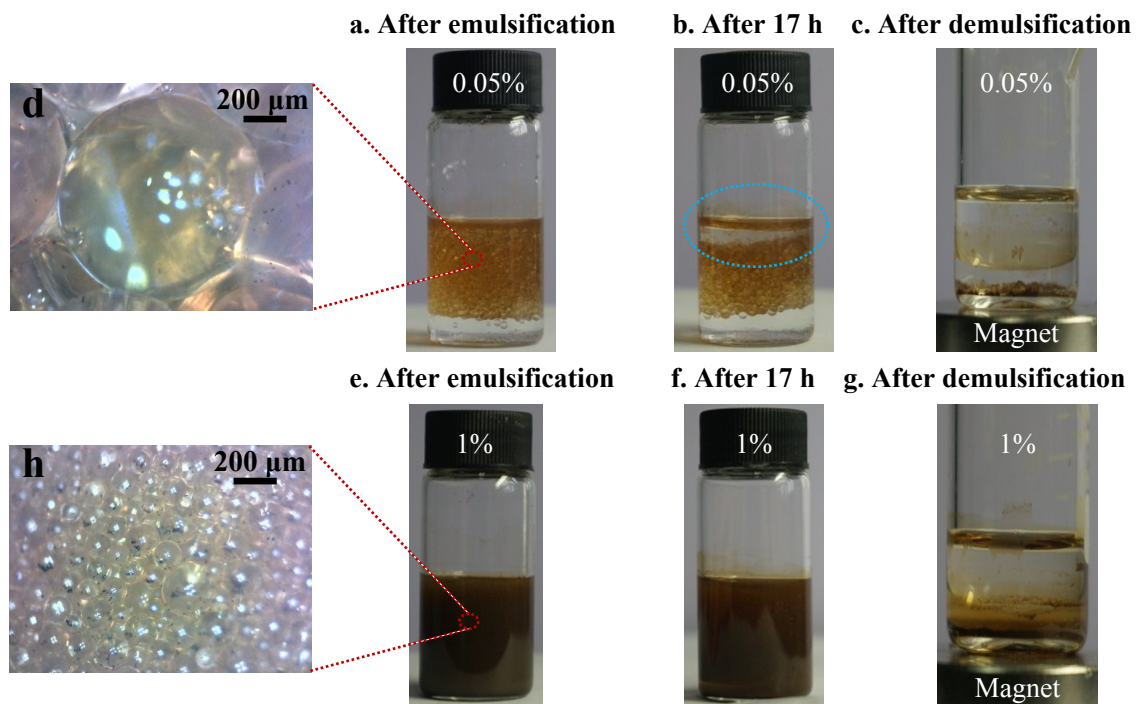

1

2 Figure S10 Emulsions stabilized by  $\text{Fe}_3\text{O}_4@\text{SiO}_2\text{-NH}_2$  nanoparticles at 0.05 wt%

3 and 1 wt% after preparation (a) and (e), placed in 17 h (b) and (f), after

4 demulsification (c) and (g). Stereo microscopic images of emulsions (d) and (h).

1 Table S1 Volume of the stable emulsion ( $V_e$ ), actual volume of the whole system  
 2 ( $V_{\text{total}} = 6\text{mL}$ ), and their ratio ( $V_e/V_{\text{total}}$ ) in the presence of 0.1, 0.2, and 0.4 wt%  
 3 nanoparticles over time.

|                            | After preparation |     |     | After 25 d |     |     | After 52 d |     |     |
|----------------------------|-------------------|-----|-----|------------|-----|-----|------------|-----|-----|
| $C$ (wt%)                  | 0.1               | 0.2 | 0.4 | 0.1        | 0.2 | 0.4 | 0.1        | 0.2 | 0.4 |
| $V_e$ (mL)                 | 4.8               | 5.4 | 6.0 | 4.5        | 5.1 | 5.4 | 4.5        | 5.1 | 5.4 |
| $V_e/V_{\text{total}}$ (%) | 80                | 90  | 100 | 75         | 85  | 90  | 75         | 85  | 90  |

4



- 1 Table S2 Conductivity values based on the emulsion phase in the presence of  
2  $\text{Fe}_3\text{O}_4@\text{SiO}_2\text{-NH}_2$  nanoparticles at different concentrations after preparation.

| <b>Concentration (wt%)</b> | <b>Conductivity (<math>\mu\text{S}/\text{cm}</math>)</b> |
|----------------------------|----------------------------------------------------------|
| 0.1                        | 1.32                                                     |
| 0.2                        | 4.19                                                     |
| 0.4                        | 12.98                                                    |

3
